# Supplementary material
Source: PubMed Central journal article supplement (PMC3811597)

Table S1. Gradients used in amino acid enantiomer HPLC analysis

| Amino acid (D and L)                             | Gradient                                                                                                                                                                                                                                                                                 |
|--------------------------------------------------|------------------------------------------------------------------------------------------------------------------------------------------------------------------------------------------------------------------------------------------------------------------------------------------|
| Thr, Pro, Lys, Phe, Cys, Leu, Tyr, Ile, Ala, Trp | Start at 80%:20% TEAP buffer (pH3.0):acetonitrile; ramp to 70%:30% buffer:acetonitrile over 5 minutes; ramp to 50%:50% buffer:acetonitrile over 15 minutes; ramp to 80%:20% buffer:acetonitrile over 10 minutes; (injection volume: 10µl; flow rate: 0.5ml; detection wavelength: 340nm) |
| Ser, Asp, Glu, Val, HyPro                        | Start at 80%:20% TEAP buffer (pH3.0):acetonitrile; ramp to 70%:30% buffer:acetonitrile over 15 minutes; ramp to 50%:50% buffer:acetonitrile over 5 minutes; ramp to 80%:20% buffer:acetonitrile over 10 minutes; (injection volume: 10µl; flow rate: 0.5ml; detection wavelength: 340nm) |
| Arg                                              | Start at 90%:10% TEAP buffer (pH3.0):acetonitrile; ramp to 80%:20% buffer:acetonitrile over 15 minutes; ramp to 50%:50% buffer:acetonitrile over 5 minutes; ramp to 90%:10% buffer:acetonitrile over 10 minutes; (injection volume: 10µl; flow rate: 0.5ml; detection wavelength: 340nm) |
| Met                                              | Start at 80%:20% TEAP buffer (pH3.0):acetonitrile; ramp to 70%:30% buffer:acetonitrile over 5 minutes; ramp to 60%:40% buffer:acetonitrile over 15 minutes; ramp to 80%:20% buffer:acetonitrile over 10 minutes; (injection volume: 10µl; flow rate: 0.5ml; detection wavelength: 340nm) |
| Asn, Gln, His                                    | Start at 85%:15% TEAP buffer (pH3.0):acetonitrile; ramp to 75%:25% buffer:acetonitrile over 15 minutes; ramp to 50%:50% buffer:acetonitrile over 5 minutes; ramp to 85%:15% buffer:acetonitrile over 10 minutes; (injection volume: 10µl; flow rate: 0.5ml; detection wavelength: 340nm) |

TABLE S2. Screening results from *P. putida* KT2440 genomic libraries<sup>a</sup>

| Supplemented amino acid | Genome region | Gene range    | Annotated function of genes of interest                                                                                                         |
|-------------------------|---------------|---------------|-------------------------------------------------------------------------------------------------------------------------------------------------|
| D-Pro                   | 1             | PP1251-PP1256 | PP1255: FAD-dependent oxidoreductase                                                                                                            |
|                         | 2             | PP1257-PP1259 | <b>PP1258: proline racemase<sup>b</sup></b>                                                                                                     |
|                         | 3             | PP3588-PP3597 | PP3590: aromatic amino acid aminotransferase<br>PP3591: $\Delta^1$ -piperideine-2-carboxylate reductase<br>PP3596: FAD-dependent oxidoreductase |
| D-Lys                   | 1             | PP1162-PP1165 | PP1163: FAD-binding oxidoreductase                                                                                                              |
|                         | 2             | PP3719-PP3727 | PP3721: aspartate aminotransferase<br><b>PP3722: alanine racemase/Air</b>                                                                       |
| D-Leu                   | 1             | PP3589-PP3593 | PP3590: aromatic amino acid aminotransferase<br>PP3591: $\Delta^1$ -piperideine-2-carboxylate reductase                                         |
|                         | 2             | PP3593-PP3598 | PP3596: FAD-dependent oxidoreductase                                                                                                            |
|                         | 3             | PP3717-PP3724 | PP3721: aspartate aminotransferase<br><b>PP3722: alanine racemase/Air</b>                                                                       |
|                         | 4             | PP5264-PP5271 | <b>PP5269: alanine racemase/DadX</b><br>PP5270: D-amino acid dehydrogenase/DadA                                                                 |
| D-Phe                   | 1             | PP2244-PP2253 | PP2246: FAD-dependent oxidoreductase                                                                                                            |

<sup>a</sup>The genes from each region are designated according to their genomic locus tag, and the range of genes indicates the minimal unit identified for each region. Genes of interest from these regions include those whose predicted products belong to enzyme families known to catalyze reactions characteristic of amino acid metabolism. The minimal genomic region does not imply that more than one gene from this region is required for recovery of the phenotype. The coverage for the entire screening with each amino acid exceeded 500× genome coverage.

<sup>b</sup>ORFs in **bold** are the focus of the current study.

Figure S1. Genomic synteny. *dadAX* region (A) and *proR* region (B) in *P. aeruginosa* PAO1, *P. protegens* Pf-5, *P. putida* KT2440, and *P. putida* GB-1. Gene numbers and annotations were obtained from Pseudomonas Genome Database.

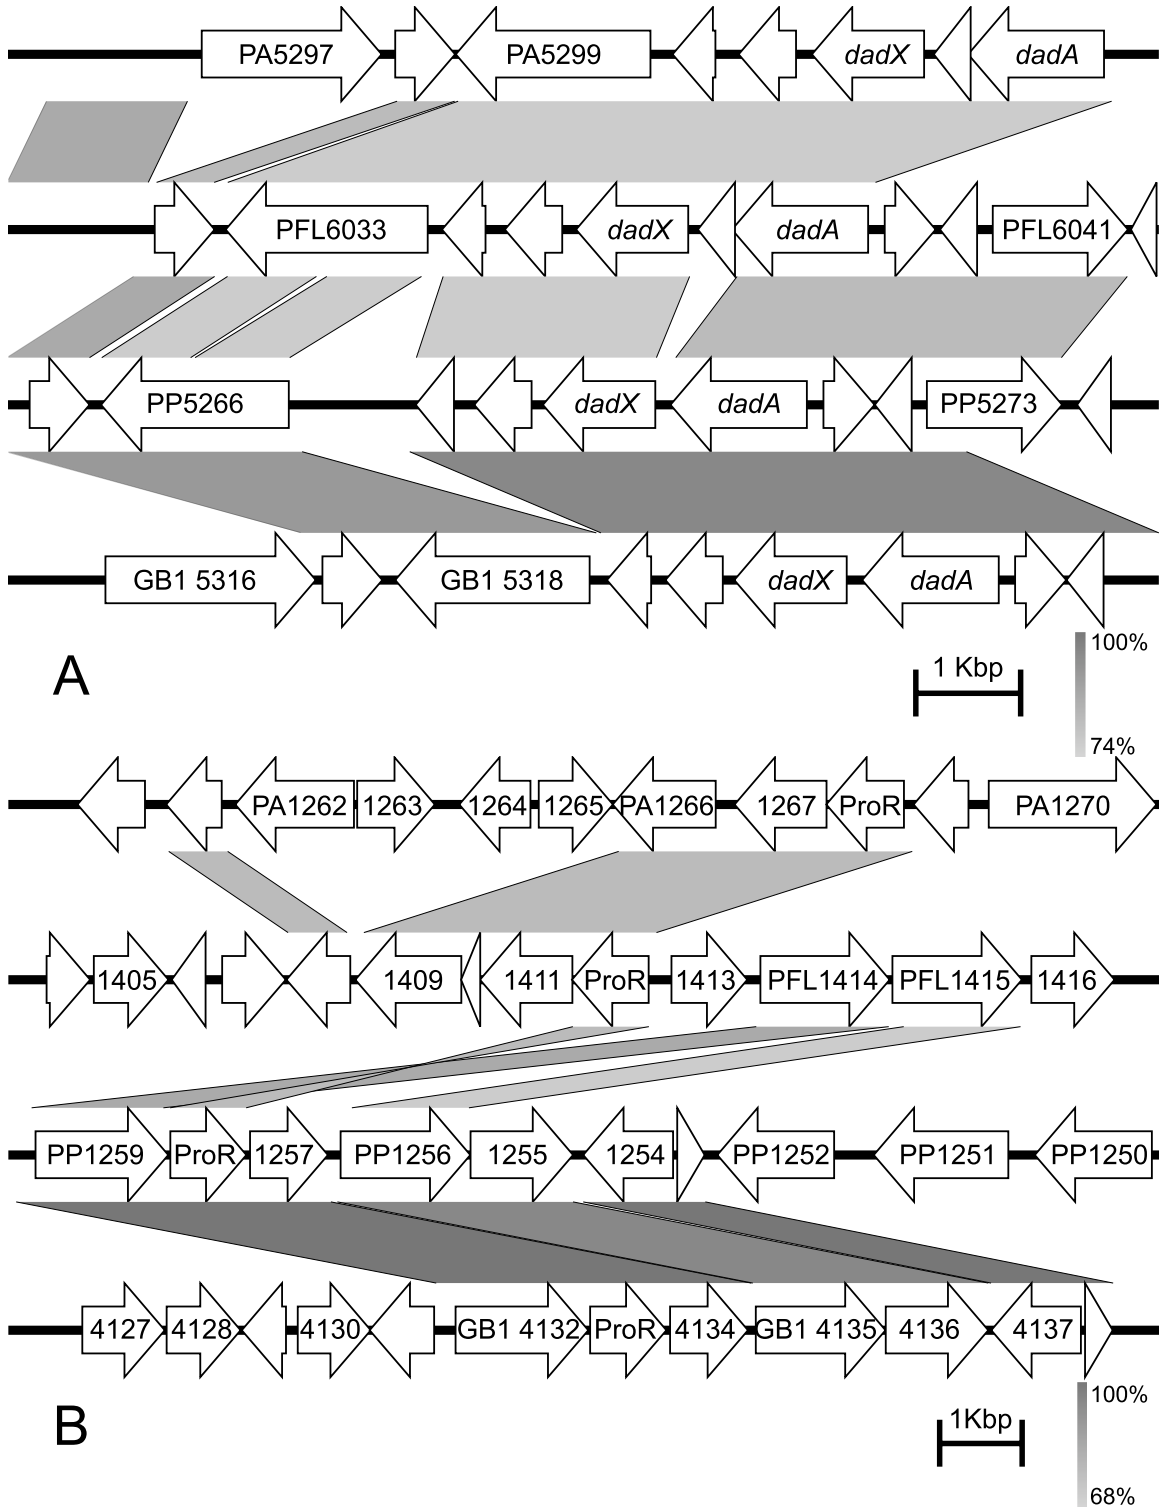

Supplement: JB.00761-13_zjb999092879so1.pdf [file JB.00761-13_zjb999092879so1.pdf]
